# Supplementary material for: Potential of genotyping-by-sequencing for genomic selection in livestock populations
Source: Springer Nature journal article supplement (doi:10.1186/s12711-015-0102-z), 2015-01-01
Supplement: MOESM1 [file 12711_2015_102_MOESM1_ESM.pdf]

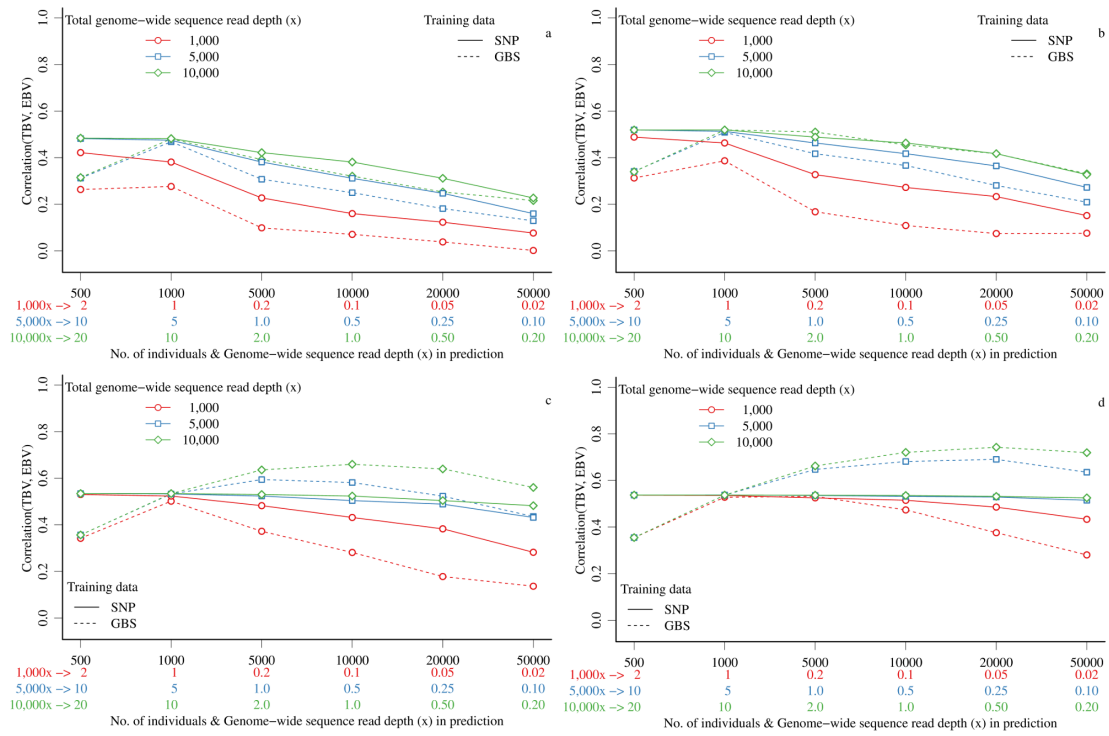

**Figure S1. Accuracy with GBS data in the expanding prediction set and SNP array data (solid lines) or GBS data (dashed lines) in training.** Training on SNP array data involved 1,000 individuals, while training on GBS data involved the same number of individuals and genome-wide sequence read depth as in the prediction set. Different marker densities are shown in top-left – a) 3K, top-right – b) 10K, bottom-left – c) 60K, and bottom-right – d) 300K.
